# Supplementary material
Source: publisher site journal article supplement (https://www.dovepress.com/article/262215)
Supplement: Supplementary file 1 [file get_supplementary_file.php]

**Additional file**

**
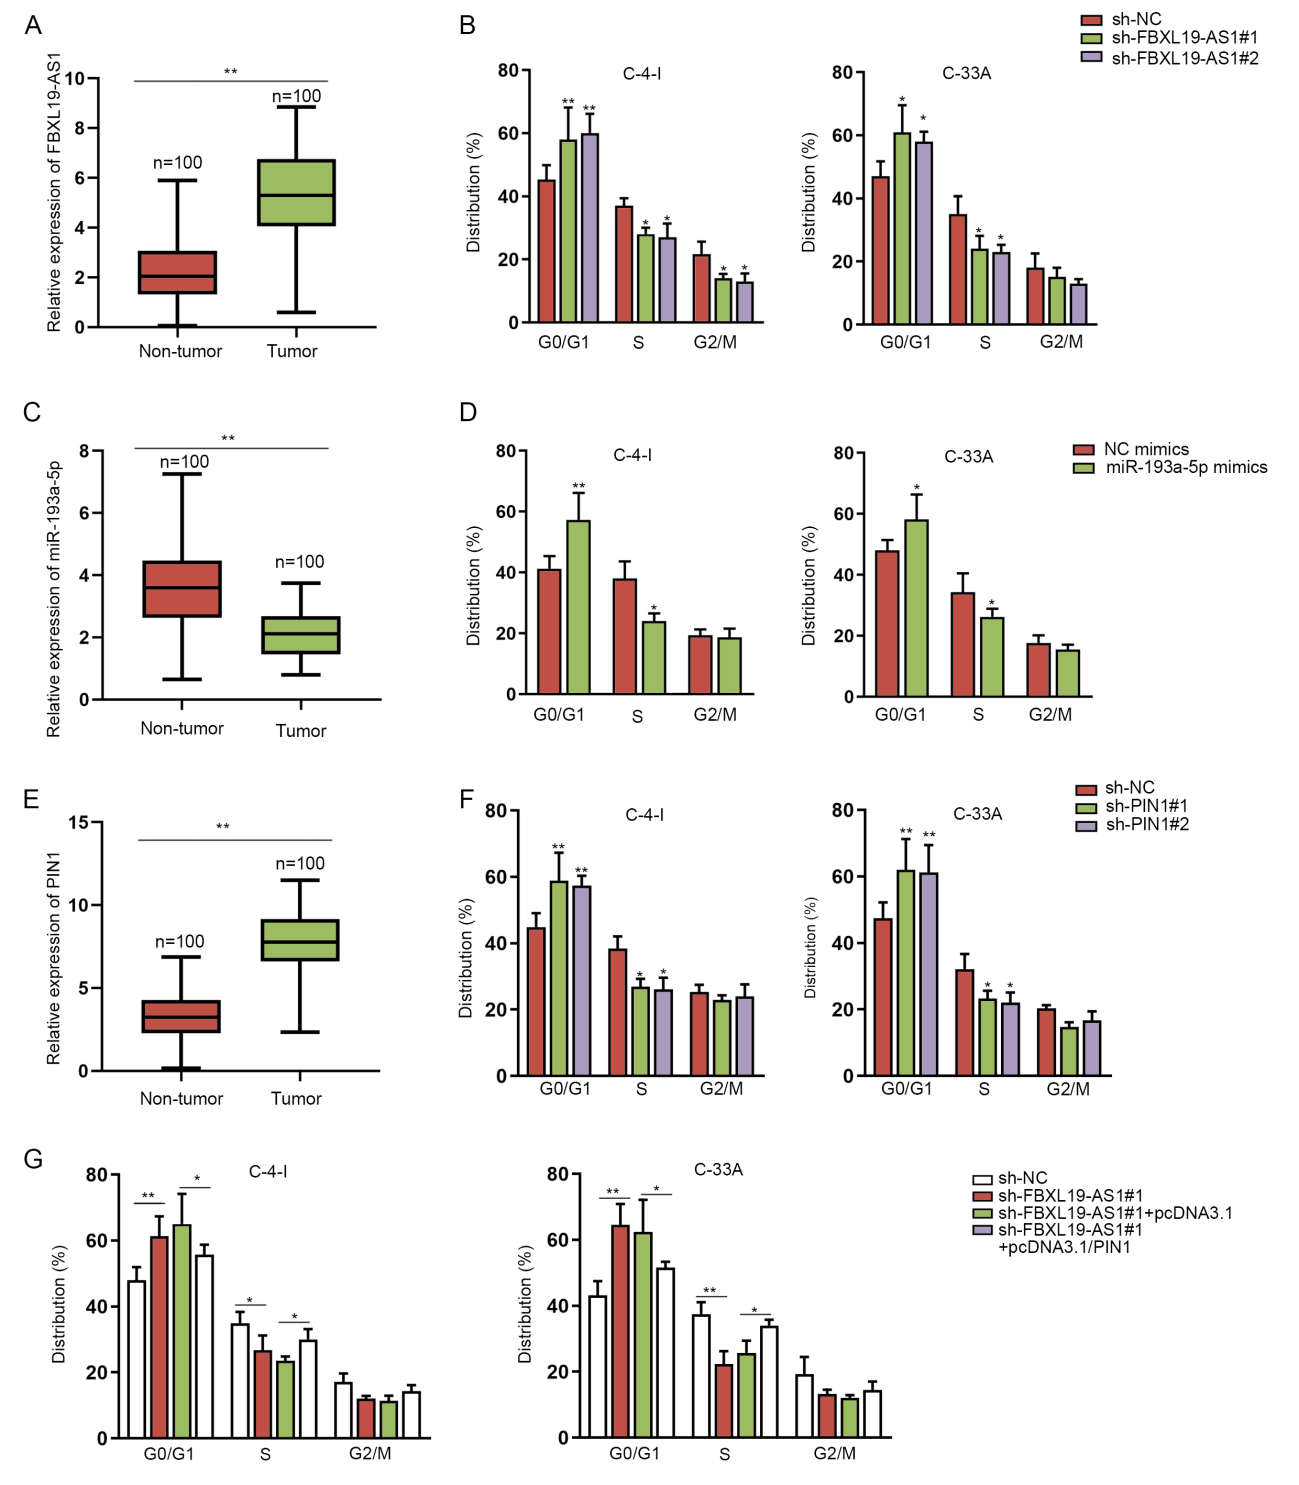
**

**Supplementary figure 1**

(A) The expression of FBXL19-AS1 in 100 pairs of cervical cancer tissues was determined via RT-qPCR. (B) The impact of silenced FBXL19-AS1 on cell cycle progression was assessed by flow cytometry analysis. (C) The level of miR-193a-5p in 100 pairs of cervical cancer tissues was determined via RT-qPCR. (D) The influence of miR-193a-5p overexpression on cell cycle progression was assessed by flow cytometry analysis. (E) PIN1 expression in 100 pairs of cervical cancer tissues was examined by RT-qPCR. (F) The effect of PIN1 suppression on cell cycle progression was evaluated by flow cytometry analysis. (G) Cell cycle distribution in cervical cancer cells with FBXL19-AS1 inhibition or together with PIN1 upregulation was evaluated via flow cytometry analysis. *P<0.05, **P<0.01.
